# Supplementary material for: Factors affecting T cell responses induced by fully synthetic glyco-gold-nanoparticles
Source: Royal Society of Chemistry journal article supplement (doi:10.1039/c2nr32338a), 2012-11-08
Supplement: c2nr32338a.pdf [file c2nr32338a.pdf]

## Electronic Supplementary Information

for

# **Factors Affecting T Cell Responses Induced by Fully Synthetic Glyco Gold-Nanoparticles**

Silvia Fallarini,<sup>1</sup> Tiziana Paoletti,<sup>1</sup> Carolina Orsi Battaglini,<sup>1</sup> Paolo Ronchi,<sup>2</sup> Luigi Lay,<sup>2</sup> Renato Bonomi,<sup>3</sup> Satadru Jha,<sup>3</sup> Fabrizio Mancin,<sup>3</sup> Paolo Scrimin,<sup>\*,3</sup> and Grazia Lombardi<sup>\*,1</sup>

<sup>1</sup>DISCAFF, University of “Piemonte Orientale Amedeo Avogadro”, Via Bovio 6, 28100 Novara, Italy

<sup>2</sup>Department of Organic and Industrial Chemistry and CISI and ISTM-CNR, University of Milano, Via Venezian 21, 20133 Milano, Italy

<sup>3</sup>Department of Chemical Sciences and ITM-CNR, University of Padova, Via Marzolo 1, 35131 Padova, Italy

## Further Experimental Details

The Scheme for the preparation of the Fluorescein-tagged thiol (**iv**) is reported below.

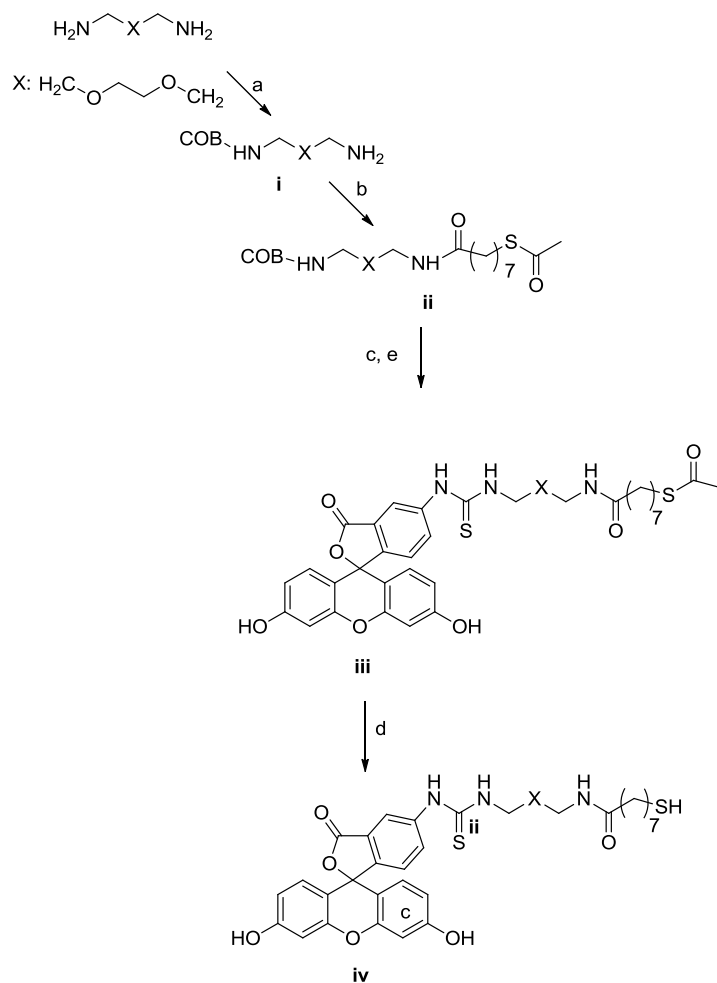

**Scheme.** a: BOC (0.6 equiv), dioxane, rt, 12 h. b: 8-acetylsulfanyl-octanoic acid pentafluorophenyl ester (0.9 equiv), DIPEA (1.0 equiv), DCM, rt, 12 h. c: TFA/DCM (1:1), 0 °C – rt, 30 min. d: 6 M HCl/EtOH (1:1), 60 °C, 3 h. e: Fluorescein 5-isothiocyanate (0.9 equiv), DIPEA ( 1.63 equiv), THF, rt, 12 h.

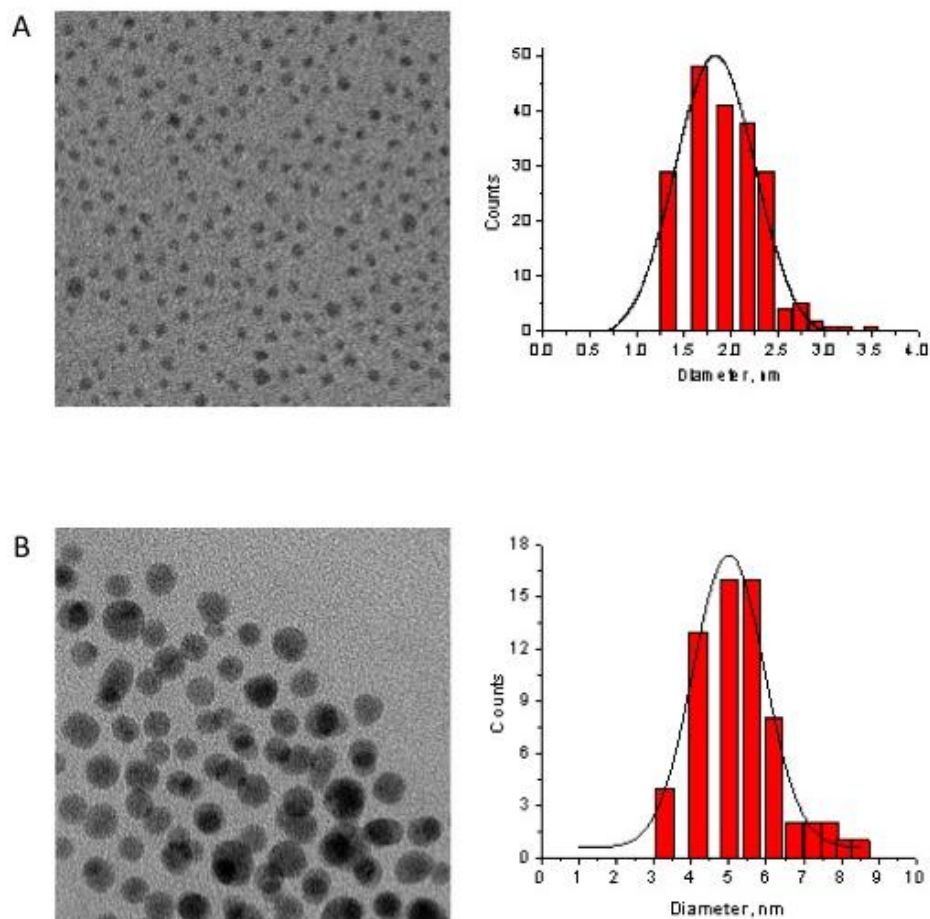

**Figure S1.** Nanoparticle characterizations. (A) TEM image of **1/3** (the bar corresponds to 5 nm) and size distribution: average diameter =  $1.8 \pm 0.5$  nm. (B) TEM image of **2/4** (the bar corresponds to 5 nm) and size distribution: average diameter =  $4.9 \pm 0.9$  nm.

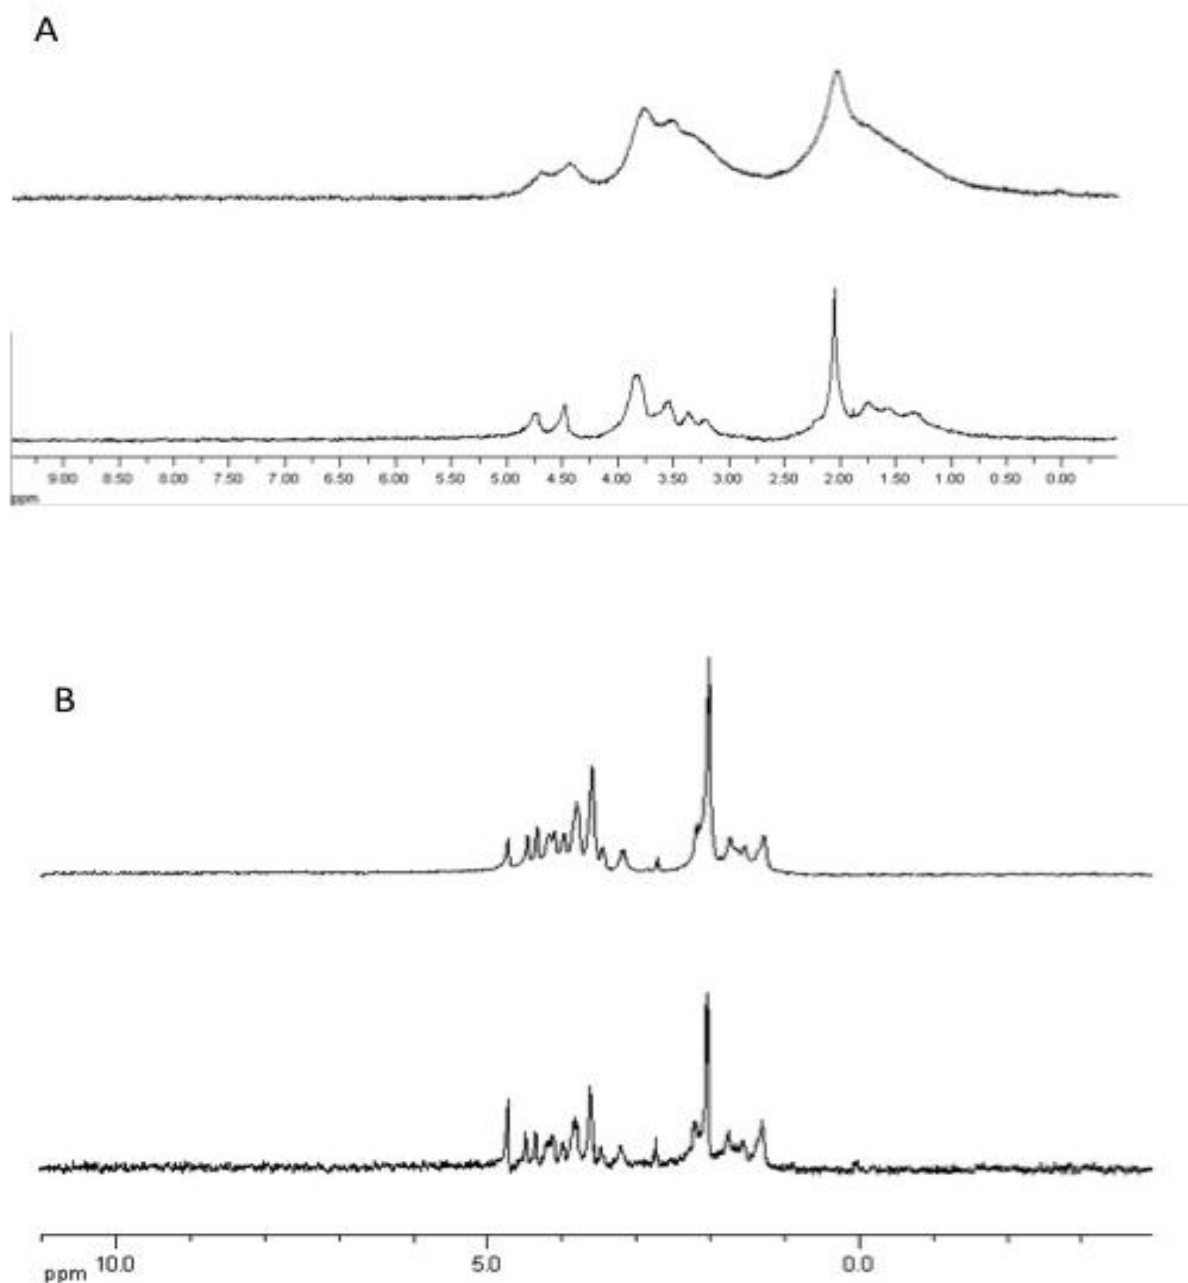

**Figure S2.**  $^1\text{H}$ -NMR spectra. Diffusion filtered  $^1\text{H}$ -NMR (300 MHz) spectra of the Au-NPs **1** and **2** (monosaccharide-coated) (A), and **3** and **4** (disaccharide-coated) (B) in  $\text{D}_2\text{O}$ , mixing time 0.2 sec,  $T = 28\text{ }^\circ\text{C}$ .

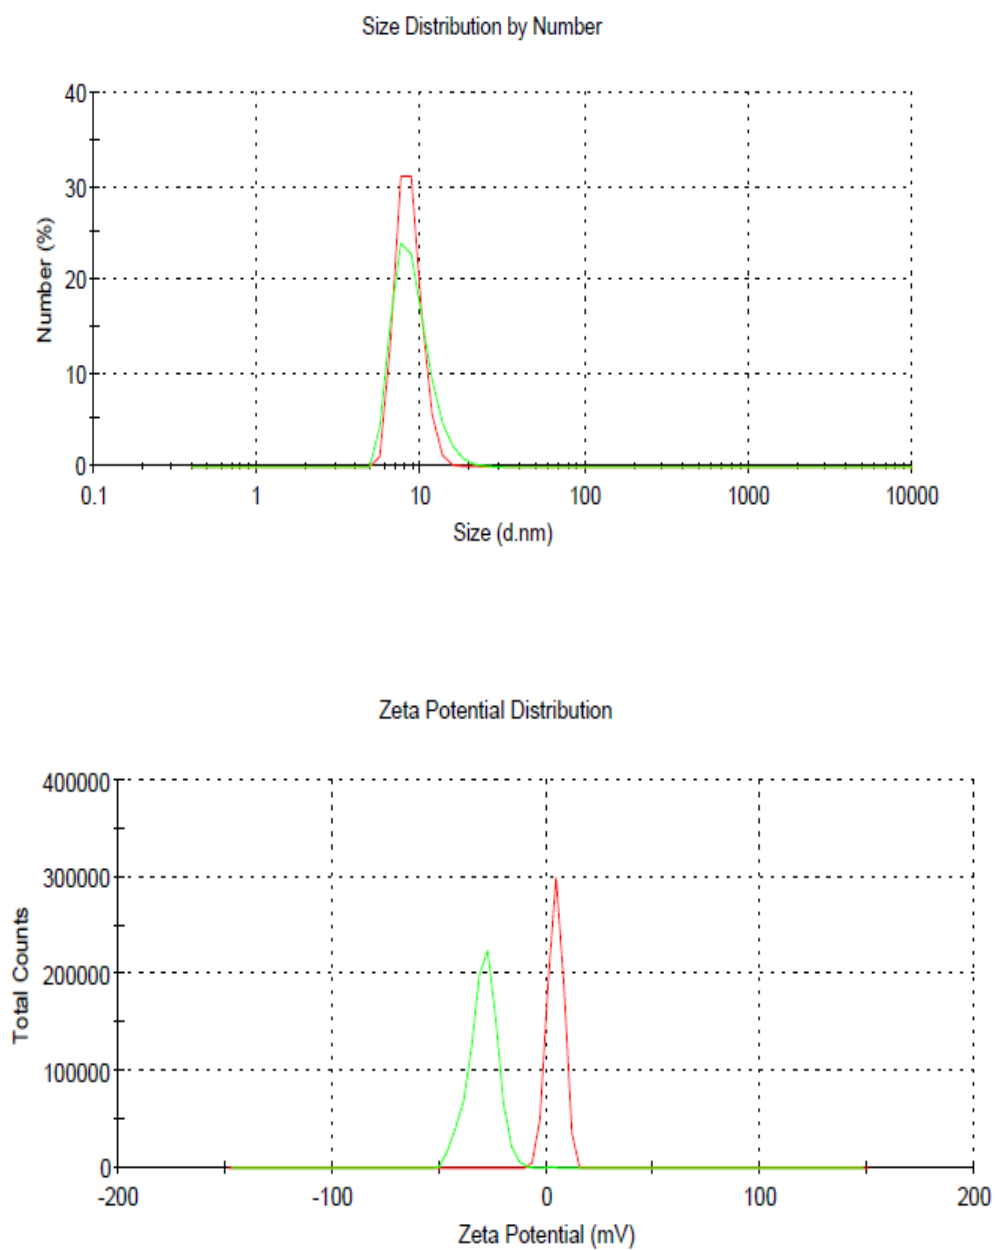

**Figure S3.** Characterization of 5 nm Glyco-Au-NPs by dynamic light scattering hydrodynamic diameter, top, and Z potentials, bottom, (Glyco-Au-NPs **2** in red, **4** in green)

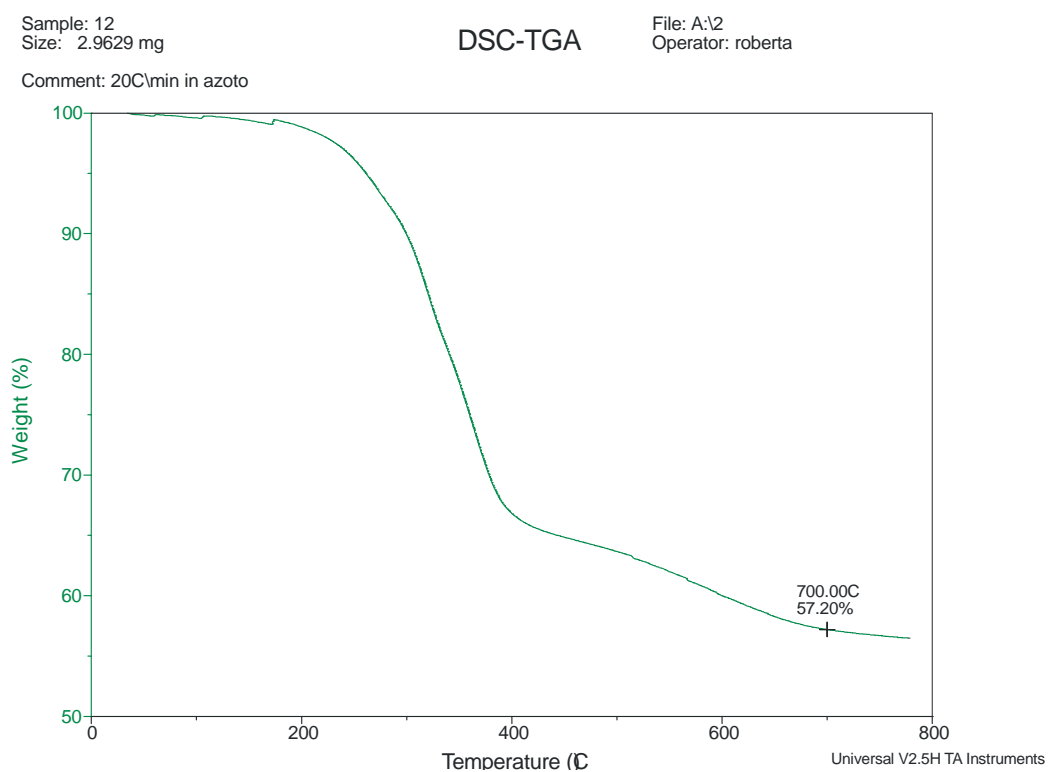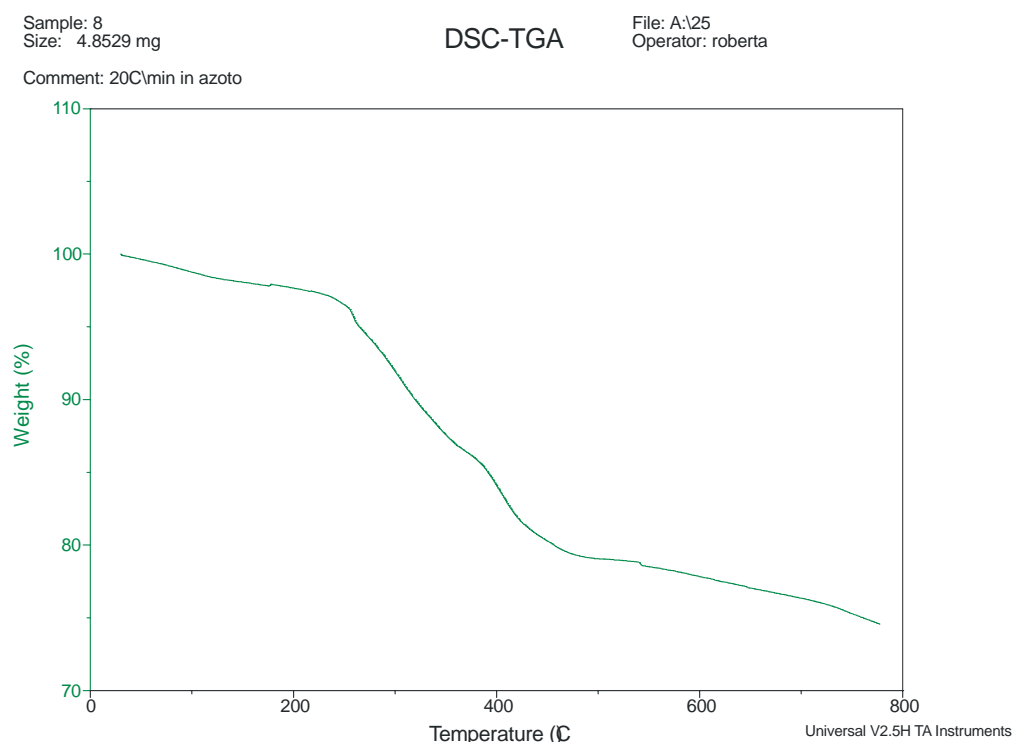

**Figure S4.** Characterization of 5 nm Glyco-Au-NPs by therogravimetry; top: Glyco-Au-NPs **3** ; bottom: Glyco-Au-NPs **1**.

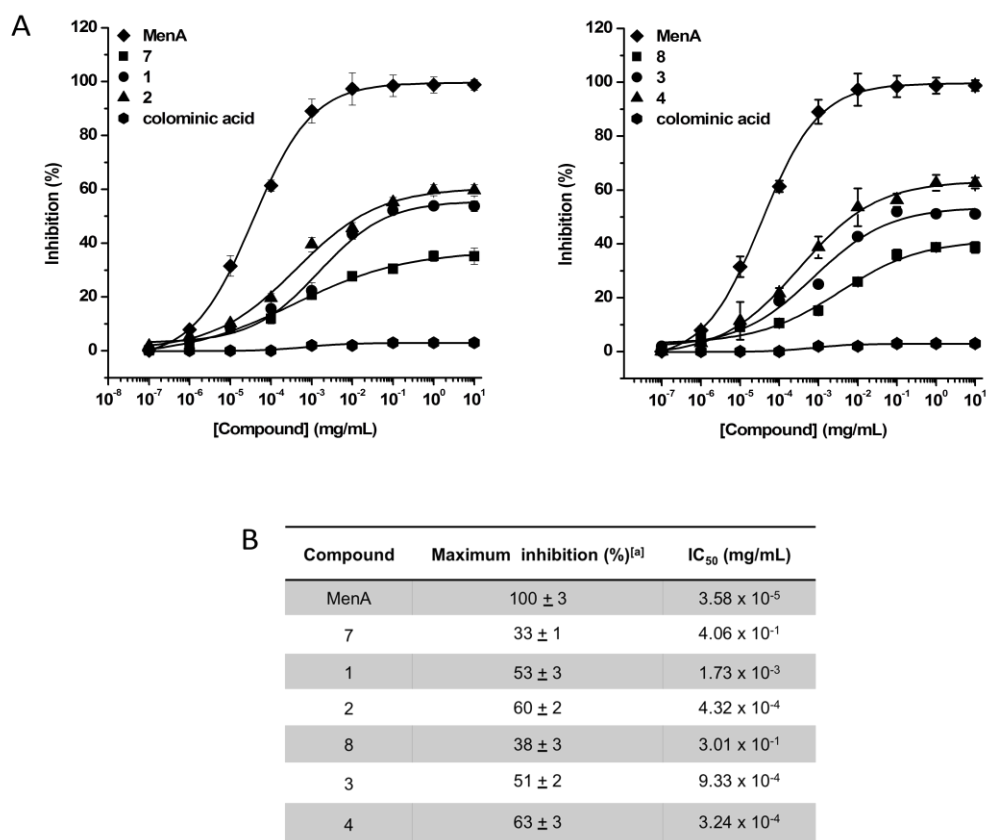

**Figure S5:** Glyco-Au-NPs ability to bind specific anti-MenA Ab. (A) Concentration-response curves of monosaccharide **8**, Glyco-Au-NPs **1** and **2** (left panel) or disaccharide **9**, Glyco-Au-NPs **3** and **4** (right panel) for the inhibition of the binding between MenA and the anti-MenA mouse polyclonal Ab evaluated by competitive ELISA. (B) The maximum inhibition elicited at 1 mg/ml by each compound in the ELISA. The concentration of each compound that produce the 50% of the maximum inhibition (IC<sub>50</sub>). The data represent means ± SEM of five experiments run in triplicate.

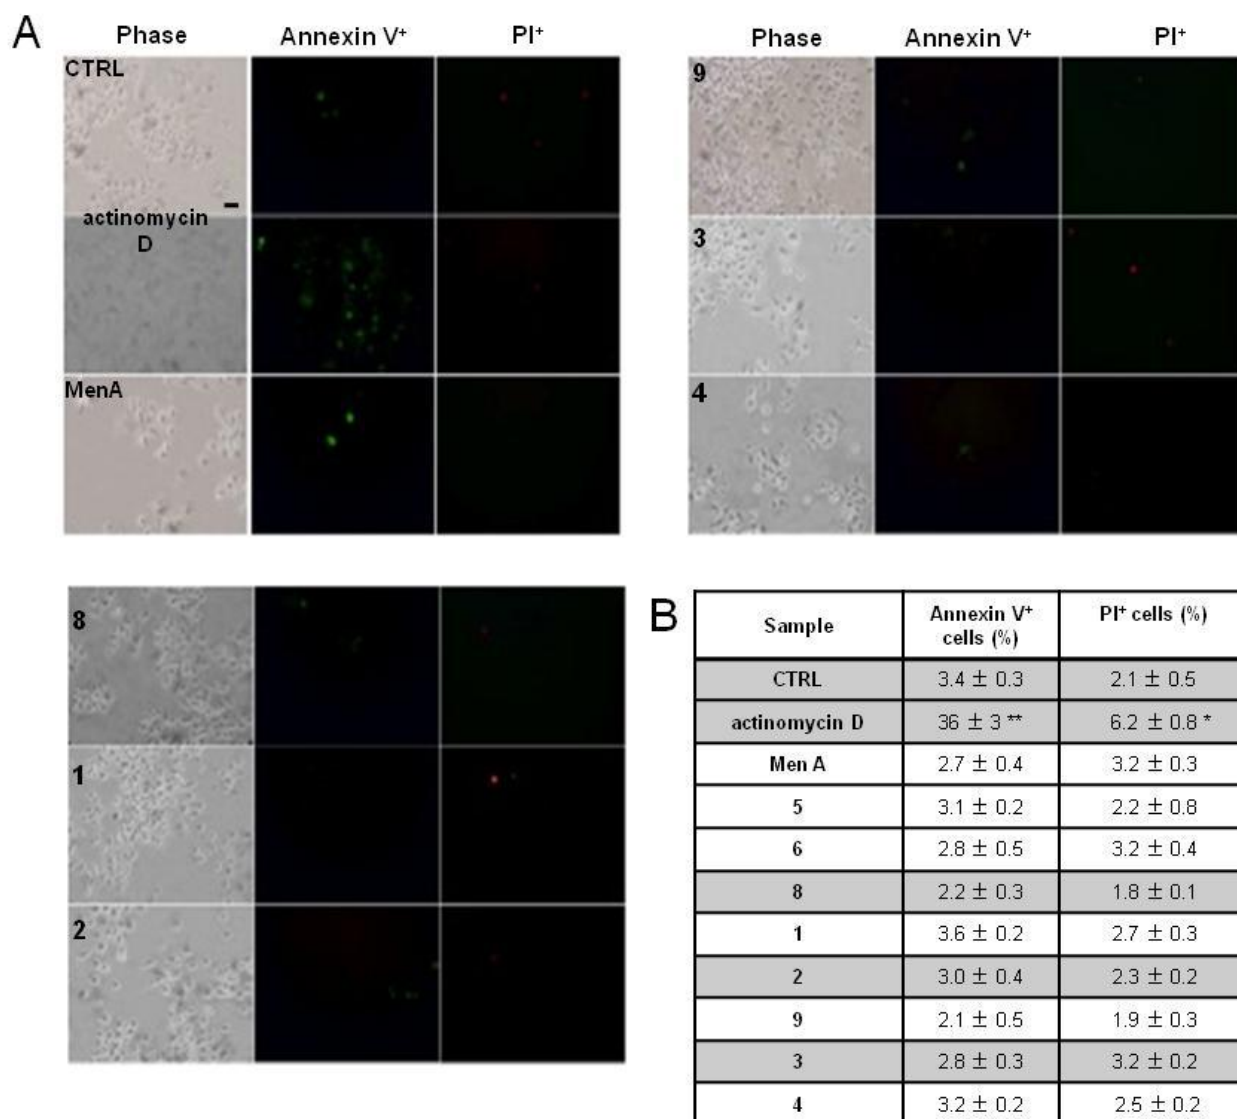

**Figure S6.** A. Effects of the test compounds on apoptotic or necrotic cell death. Representative images include cell morphology (left panels), apoptotic cells stained with annexin V (green; middle panels), and necrotic cells stained with PI (red; right panels) after (24 h) treatment with saccharides **8** and **9** or Glyco-Au-NPs **1-4**. Images are representative of four different cell preparations. (Scale bar = 30 nm). B. Apoptotic and necrotic cells were counted under epifluorescence microscopy in six different fields of each sample. In all sample, the number of annexin V<sup>+</sup> and PI<sup>+</sup> cells were expressed as percentage over the total counted cells. The data represent means ± SEM of five experiments. Cells treated (2 h) with 0.5 mg/ml actinomycin D were considered as positive control of apoptosis, while TEG-functionalized Au-NPs **5** and **6** were used as Au-NP controls. \*P≤0.05; \*\*P≤0.01 versus compound-untreated cells (CTRL).

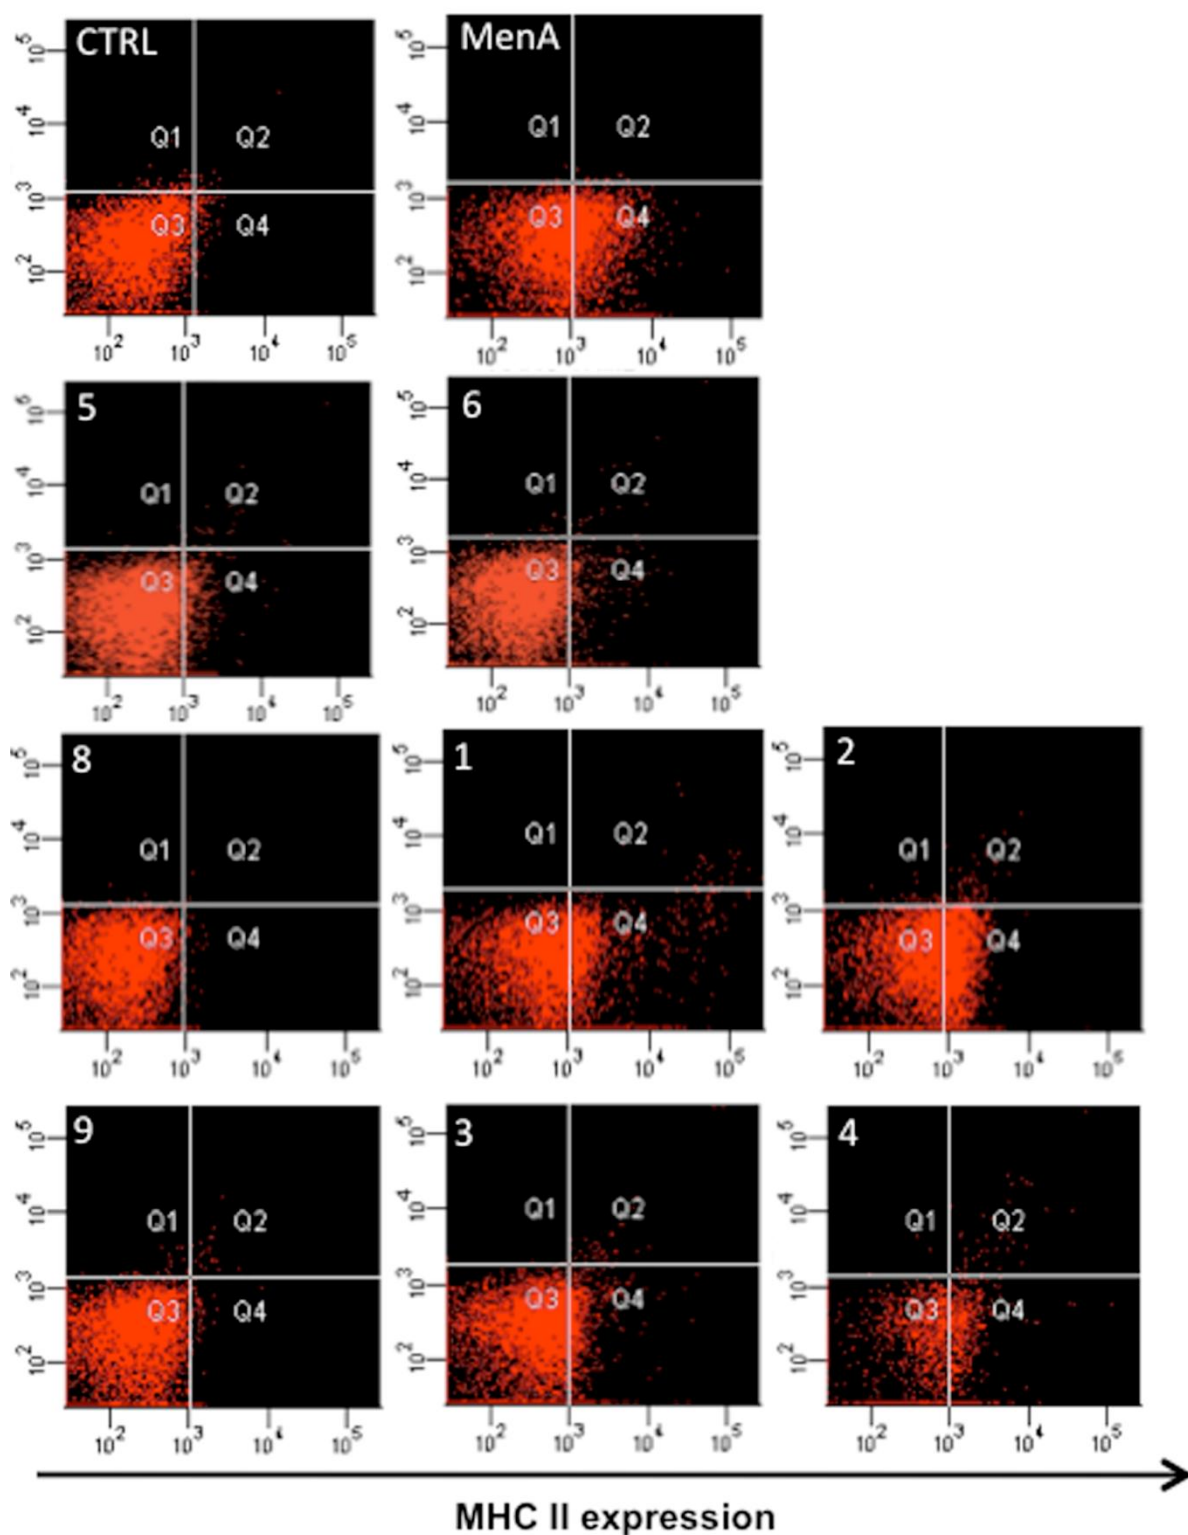

**Figure S7.** Glyco-Au-NPs activate macrophage effector functions. Effects of the test compounds on MHC II expression. FACS dot-plots show the expression of MHC II induced on RAW 264.7 cells by test compounds. Au-NPs **5** and **6** were used as Au-NP controls, while compound-untreated cells (CTRL) as negative controls. The y-axis represents fluorescence intensity.

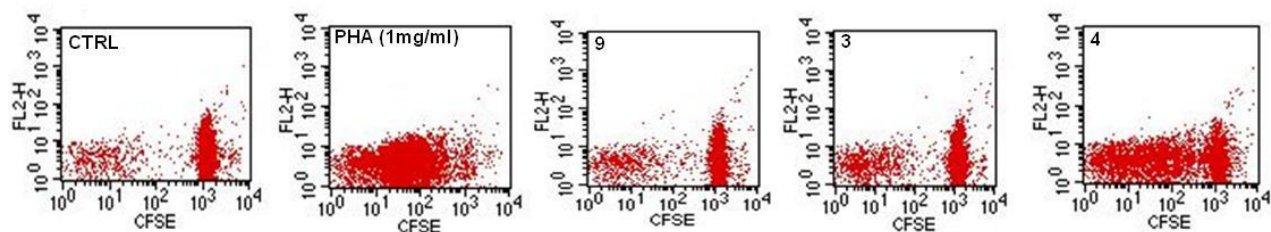

**Figure S8.** T cell proliferation measured by FACS as reduction of CFSE fluorescence intensity due to cell division. Representative dot plots of CFSE-labelled T cells treated (6 days) with PHA (positive control), disaccharides **9**, Glyco-Au-NPs **3** and **4**.

| Release IL-2 (pg/ml) |              |                    |                    |                    |                     |                     |
|----------------------|--------------|--------------------|--------------------|--------------------|---------------------|---------------------|
| [compound](μM)       | 0            | $1 \times 10^{-2}$ | $1 \times 10^{-1}$ | $1 \times 10^0$    | $1 \times 10^1$     | $1 \times 10^2$     |
| PHA                  | -            | -                  | -                  | $386 \pm 18^{**}$  | -                   | -                   |
| CTRL                 | $12 \pm 1.7$ | -                  | -                  | -                  | -                   | -                   |
| 5                    |              | $13 \pm 2.5$       | $14 \pm 1.3$       | $12 \pm 1.9$       | $15 \pm 1.3$        | $15 \pm 2.3$        |
| 6                    |              | $14 \pm 2.4$       | $17 \pm 1.8$       | $15 \pm 1.4$       | $13 \pm 1.4$        | $13 \pm 1.5$        |
| 8                    | -            | $12 \pm 2.2$       | $15 \pm 1.9$       | $12 \pm 1.7$       | $18 \pm 2.1$        | $17 \pm 1.3$        |
| 1                    | -            | $13 \pm 2.2$       | $19 \pm 1.5$       | $13 \pm 1.8$       | $14 \pm 2.2$        | $15 \pm 1.8$        |
| 2                    | -            | $14 \pm 1.9$       | $13 \pm 1.7$       | $15 \pm 2.1$       | $19 \pm 2.3$        | $15 \pm 1.8$        |
| 9                    | -            | $8 \pm 1.3$        | $12 \pm 2.4$       | $14 \pm 1.9$       | $13 \pm 2.2$        | $15 \pm 2.9$        |
| 3                    | -            | $20 \pm 3.5$       | $61 \pm 7.1^*$     | $33 \pm 4.2$       | $16 \pm 5.1$        | $12 \pm 3.3$        |
| 4                    | -            | $8 \pm 2.3$        | $66 \pm 7.2^*$     | $102 \pm 8.1^{**}$ | $144 \pm 16.6^{**}$ | $132 \pm 12.6^{**}$ |

**Figure S9.** Ability of test compounds to induce IL-2 release from activating T cells evaluated by ELISA. Data represent means  $\pm$  SEM of seven experiments run in triplicate. \* $P \leq 0.05$ ; \*\* $P \leq 0.01$  vs. compound-untreated controls.
